# Supplementary material for: Cyanidin-3-O-glucoside and Peonidin-3-O-glucoside-Rich Fraction of Black Rice Germ and Bran Suppresses Inflammatory Responses from SARS-CoV-2 Spike Glycoprotein S1-Induction In Vitro in A549 Lung Cells and THP-1 Macrophages via Inhibition of the NLRP3 Inflammasome Pathway
Source: MDPI journal article supplement (doi:10.3390/nu14132738), 2022-06-30
Supplement: s1 [file s1]

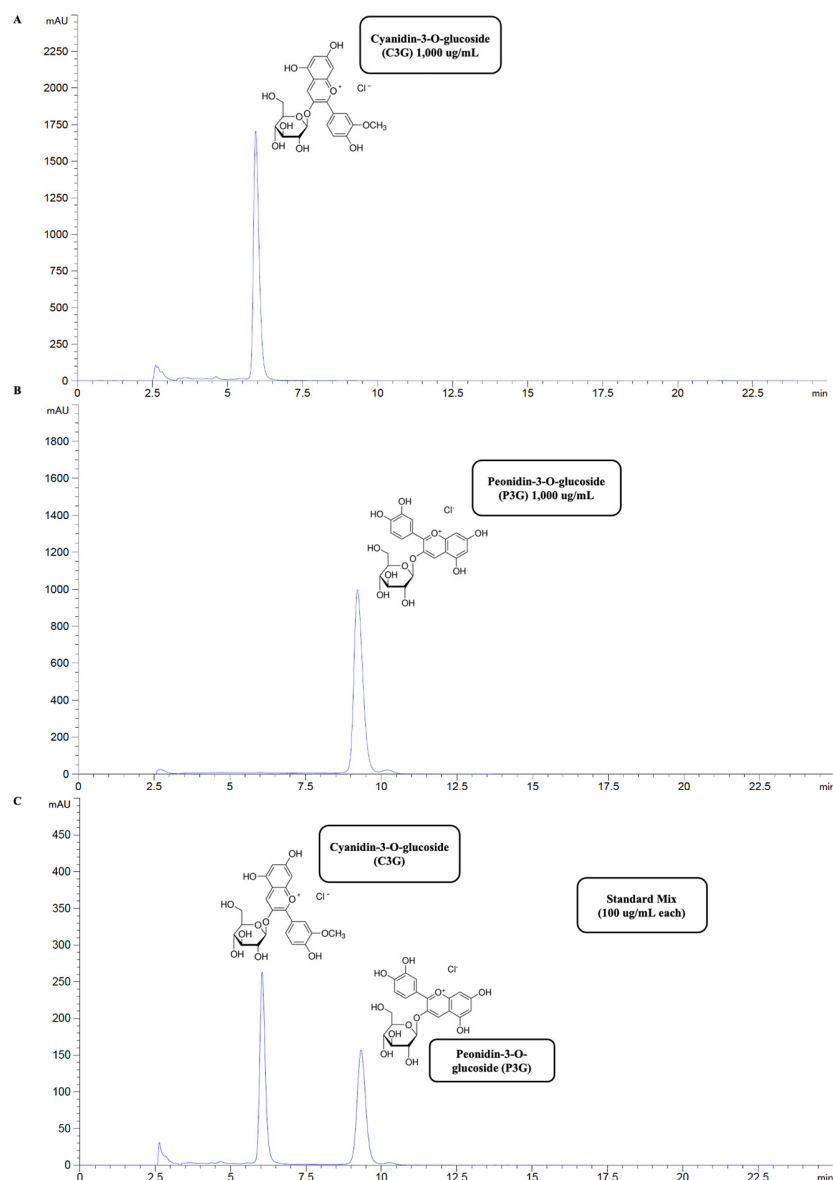

**Figure S1.** HPLC chromatograms of C3G, P3G, and standard mix. HPLC chromatogram of standard of C3G at 1,000 ug/mL (A) and P3G at 1,000 ug/mL (B) and Standard mix of C3G and P3G anthocyanins at 100 ug/mL for each standard (C) as determined by HPLC technique. The HPLC chromatogram were evaluated using reversed-phase C18 column. The mobile phase was composed of mobile phase A (0.4% Trifluoroacetic acid in water) and mobile phase B (0.45% Trifluoroacetic acid in acetonitrile) under isocratic condition. The detection wavelength was 520 nm. The flow rate was set to 1.0 mL/min.
